# Supplementary material
Source: PubMed Central journal article supplement (PMC4868060)

## Supplementary Materials

Dapper, AL and MJ Wade (2016) The evolution of sperm competition genes: the effect of mating system on levels of genetic variation within and between species.

**Supplemental Table 1:** The change in frequency of the *A* allele ( $\Delta p$ ) when each female mates with exactly two males ( $k = 2$ ) for Case 1 (haploid adults).

| $\text{♂ Genotypes}$ | $F_i$    | $p_i$ | $q_i$ | $\Delta p_i W$ | $F_i \Delta p_i$           |
|----------------------|----------|-------|-------|----------------|----------------------------|
| <i>A</i> X <i>A</i>  | $p^2$    | 1     | 0     | 0              | 0                          |
| <i>A</i> X <i>a</i>  | $2pq$    | (1/2) | (1/2) | $s/4$          | $spq/2W$                   |
| <i>a</i> X <i>a</i>  | $q^2$    | 0     | 1     | 0              | 0                          |
| <b>Total:</b>        | <b>1</b> |       |       |                | <b><math>spq/2W</math></b> |

**Supplemental Table 2:** The change in frequency of the *A* allele ( $\Delta p$ ) when each female mates with exactly two males ( $k = 2$ ) for Case 2 (diploid adults, gametic expression of sperm proteins).

| $\text{♂ Genotypes}$  | $F_i$     | $p_i$ | $q_i$ | $\Delta p_i W$ | $F_i \Delta p_i$               |
|-----------------------|-----------|-------|-------|----------------|--------------------------------|
| <i>AA</i> X <i>AA</i> | $p^4$     | 1     | 0     | 0              | 0                              |
| <i>AA</i> X <i>Aa</i> | $4p^3q$   | (3/4) | (1/4) | $(3/16)s$      | $(3/4)sp^3q/W$                 |
| <i>AA</i> X <i>aa</i> | $2p^2q^2$ | (1/2) | (1/2) | $(1/4)s$       | $(1/2)sp^2q^2/W$               |
| <i>Aa</i> X <i>Aa</i> | $4p^2q^2$ | (1/2) | (1/2) | $(1/4)s$       | $sp^2q^2/W$                    |
| <i>Aa</i> X <i>aa</i> | $4pq^3$   | (1/4) | (3/4) | $(3/16)s$      | $(3/4)spq^3/W$                 |
| <i>aa</i> X <i>aa</i> | $q^4$     | 0     | 1     | 0              | 0                              |
| <b>Total:</b>         | <b>1</b>  |       |       |                | <b><math>(3/4)spq/W</math></b> |

**Supplemental Table 3:** The change in frequency of the *A* allele ( $\Delta p$ ) for exactly two males ( $k = 2$ ) for Case 3.

| ♂ Genotypes           | $F_i$     | $G_{ij}$   | $p_{ij}$ | $W_{ij}$ | $W_{.j}$ | $\Delta p_i W$ | $F_i \Delta p_i$                        |                 |
|-----------------------|-----------|------------|----------|----------|----------|----------------|-----------------------------------------|-----------------|
| <i>AA</i> X <i>AA</i> | $p^4$     | $G_{i,AA}$ | 1        | 1        | 1        | 1              | 0                                       | 0               |
|                       |           | $G_{i,Aa}$ | 0        | -        | -        | -              | -                                       | -               |
|                       |           | $G_{i,aa}$ | 0        | -        | -        | -              | -                                       | -               |
| <i>AA</i> X <i>Aa</i> | $4p^3q$   | $G_{i,AA}$ | (1/2)    | 1        | 1        | $1-(hs/2)$     | $sh/4$                                  | $shp^3q/W$      |
|                       |           | $G_{i,Aa}$ | (1/2)    | (1/2)    | $1-hs$   | $1-(hs/2)$     | $-sh/8$                                 | $-shp^3q/2W$    |
|                       |           | $G_{i,aa}$ | 0        | -        | -        | -              | -                                       | -               |
| <i>AA</i> X <i>aa</i> | $2p^2q^2$ | $G_{i,AA}$ | (1/2)    | 1        | 1        | $1-(s/2)$      | $s/4$                                   | $sp^2q^2/2W$    |
|                       |           | $G_{i,Aa}$ | 0        | -        | -        | -              | -                                       | -               |
|                       |           | $G_{i,aa}$ | (1/2)    | 0        | -        | -              | -                                       | -               |
| <i>Aa</i> X <i>AA</i> | $4p^2q^2$ | $G_{i,AA}$ | 0        | -        | -        | -              | -                                       | -               |
|                       |           | $G_{i,Aa}$ | 1        | (1/2)    | $1-hs$   | $1-hs$         | 0                                       | 0               |
|                       |           | $G_{i,aa}$ | 0        | -        | -        | -              | -                                       | -               |
| <i>Aa</i> X <i>aa</i> | $4pq^3$   | $G_{i,AA}$ | 0        | -        | -        | -              | -                                       | -               |
|                       |           | $G_{i,Aa}$ | (1/2)    | (1/2)    | $1-hs$   | $1-(h+1)(s/2)$ | $(1-h)s/8$                              | $(1-h)spq^3/2W$ |
|                       |           | $G_{i,aa}$ | (1/2)    | 0        | -        | -              | -                                       | -               |
| <i>aa</i> X <i>aa</i> | $q^4$     | $G_{i,AA}$ | 0        | -        | -        | -              | -                                       | -               |
|                       |           | $G_{i,Aa}$ | 0        | -        | -        | -              | -                                       | -               |
|                       |           | $G_{i,aa}$ | 1        | 0        | -        | -              | -                                       | -               |
| <b>Total:</b>         | <b>1</b>  |            |          |          |          |                | <b><math>spq(ph + q(1-h))/2W</math></b> |                 |

**Supplemental Figure 1:** Difference in the magnitude of  $\Delta p \times 10^{-6}$  between the analytical approximation, which assumes a Hardy-Weinberg distribution of offspring genotypes after selection, and the simulation results of the exact equation without that assumption,  $(\Delta p_{HW} - \Delta p_{NO\_HW})$ . The initial conditions assume a constant selection coefficient,  $s = 0.01$ , and frequency of the favored allele,  $p$ , of 0.5. For Case 2 (diploid adults, haploid sperm), the difference in  $\Delta p$  is shown for two conditions: (1) each female has 1 mate (blue), and (2) each female has two mates (red). For Case 3 (diploid adults, diploid sperm), only the second condition ( $k = 2$ ) is shown (green), because there is no sperm competition when  $k = 1$ . The largest difference is  $\sim 5 \times 10^{-6}$ , which is of order  $(s)^3$ , demonstrating that analysis facilitated by the Hardy-Weinberg is excellent for the case of weak selection.

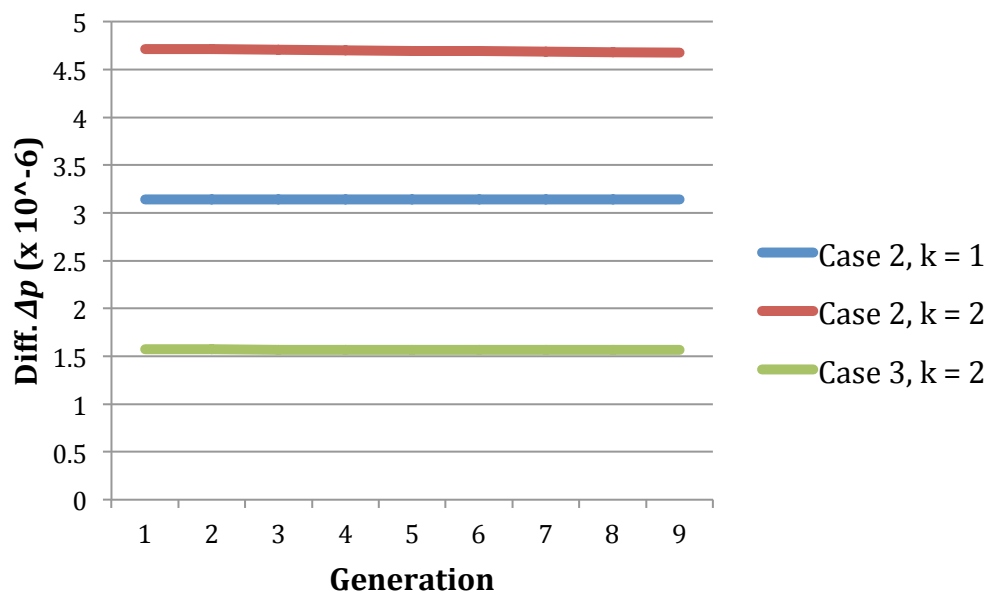

## Supplementary Figures

### Supplementary Figure 2: Change in Frequency of Beneficial Alleles

Beneficial alleles ( $s = 0.1$ ,  $h = 0.5$ ) take longer to fix when they occur in sex-specific genes (dashed, black) in comparison to constitutively expressed genes (solid, black). If they occur in sex-specific genes that function primarily in sperm competition, the expected time to fixation increases as the harmonic mean number of mates per female ( $H$ ) decreases ( $H=3$ , blue;  $H=2$ , red;  $H=1.5$ , yellow). **(A)** Case 1 – haploid males, **(B)** Case 2 – diploid males, gametic expression of reproductive proteins, and **(C)** Case 3 – diploid males, somatic expression of reproductive proteins.

### Supplementary Figure 3: Relative Levels of Gene Diversity

Sex-specific genes are expected to exhibit twice as much gene diversity at the mutation selection balance relative to standard constitutively expressed genes (black, dashed line). In Case 1 and 3, sperm competition genes are expected to exhibit even higher levels of gene diversity relative to constitutively expressed genes (grey, dotted line). In contrast, in Case 2 (diploid adults, gametic expression), sperm competition genes are expected to exhibit reduced levels of gene diversity in comparison to sex-specific genes not involved in sperm competition (grey, solid line). The relative increase in gene diversity is a function of the harmonic mean number of mates per female ( $H$ ) decreases.

#### **Supplementary Figure 4: Probability of Fixation of a New Mutation**

**(A, C, E)** New deleterious mutations ( $s < 0$ ,  $h = 0.5$ ) have a higher probability of fixing in sex-specific gene relative to standard constitutively expressed genes (black, dashed).

**(B, D, F)** Conversely, new beneficial mutations ( $s > 0$ ,  $h = 0.5$ ) have a lower probability of fixing in sex-specific gene relative to standard constitutively expressed genes. These effects are exaggerated in sex-specific genes that function primarily in sperm competition. Among sperm competition genes, the relative probability of fixation is a function of the harmonic mean number of mates per female ( $H$ ) ( $H=3$ , blue;  $H=2$ , red;  $H=1.5$ , yellow). **(A, B)** Case 1 – haploid males, **(C, D)** Case 2 – diploid males, haploid expression of reproductive proteins, and **(E, F)** Case 3 – diploid males, diploid expression of reproductive proteins.

#### **Supplementary Figure 5: Expected Ratio of Non-synonymous to Synonymous Substitutions**

Sperm competition (grey, dotted/solid lines) and sex-specific genes (black, dashed line) are expected to exhibit elevated ratios of non-synonymous to synonymous substitutions ( $dN/dS$ ) in comparison with standard, constitutively expressed genes (black, solid), given the same average selective effect of new mutations ( $Ns = -1$ ). While sperm competition increases expected  $dN/dS$  in Case 1 (haploid adults) and 3 (diploid adults, somatic expression) (grey, dotted line), it decreases expected  $dN/dS$  in Case 2 (diploid adults, gametic expression) (grey, solid line). Among sperm competition genes, the expected  $dN/dS$  ratio increases with decreasing harmonic mean number of mates per female ( $H$ ).

**Supplementary Figure 2.** Change in frequency of beneficial alleles.

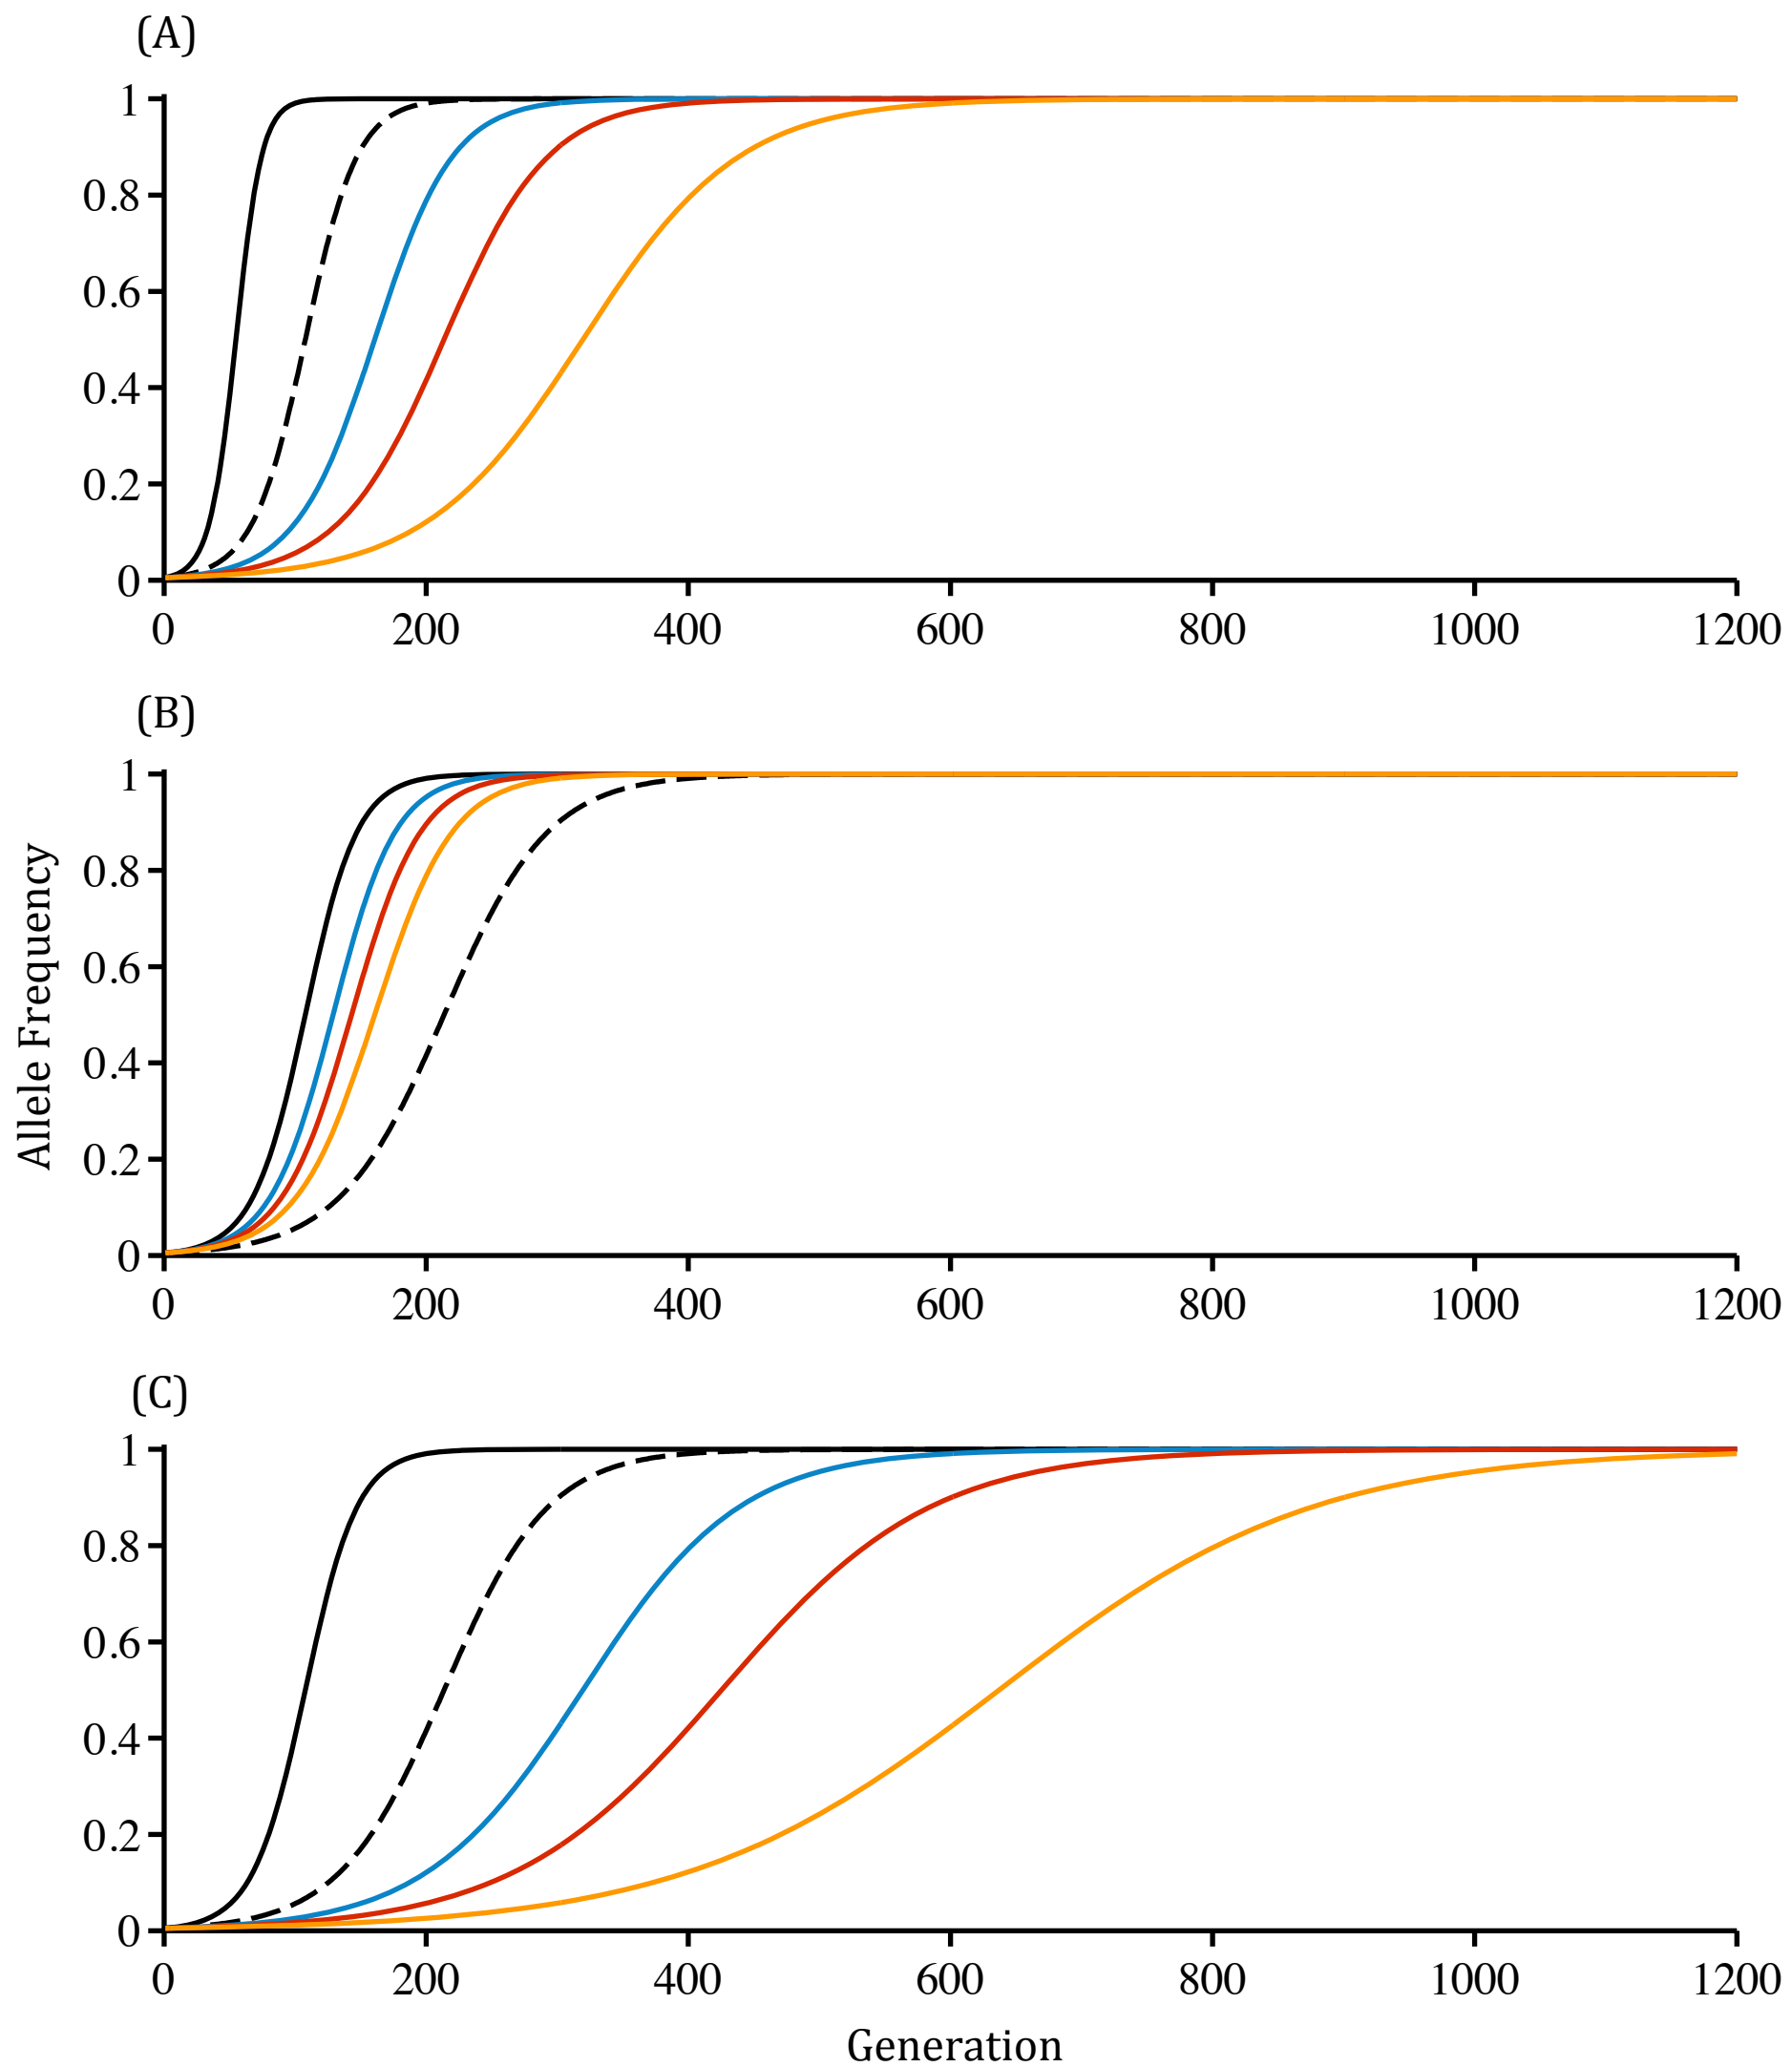

**Supplementary Figure 3.** Relative Levels of Gene Diversity.

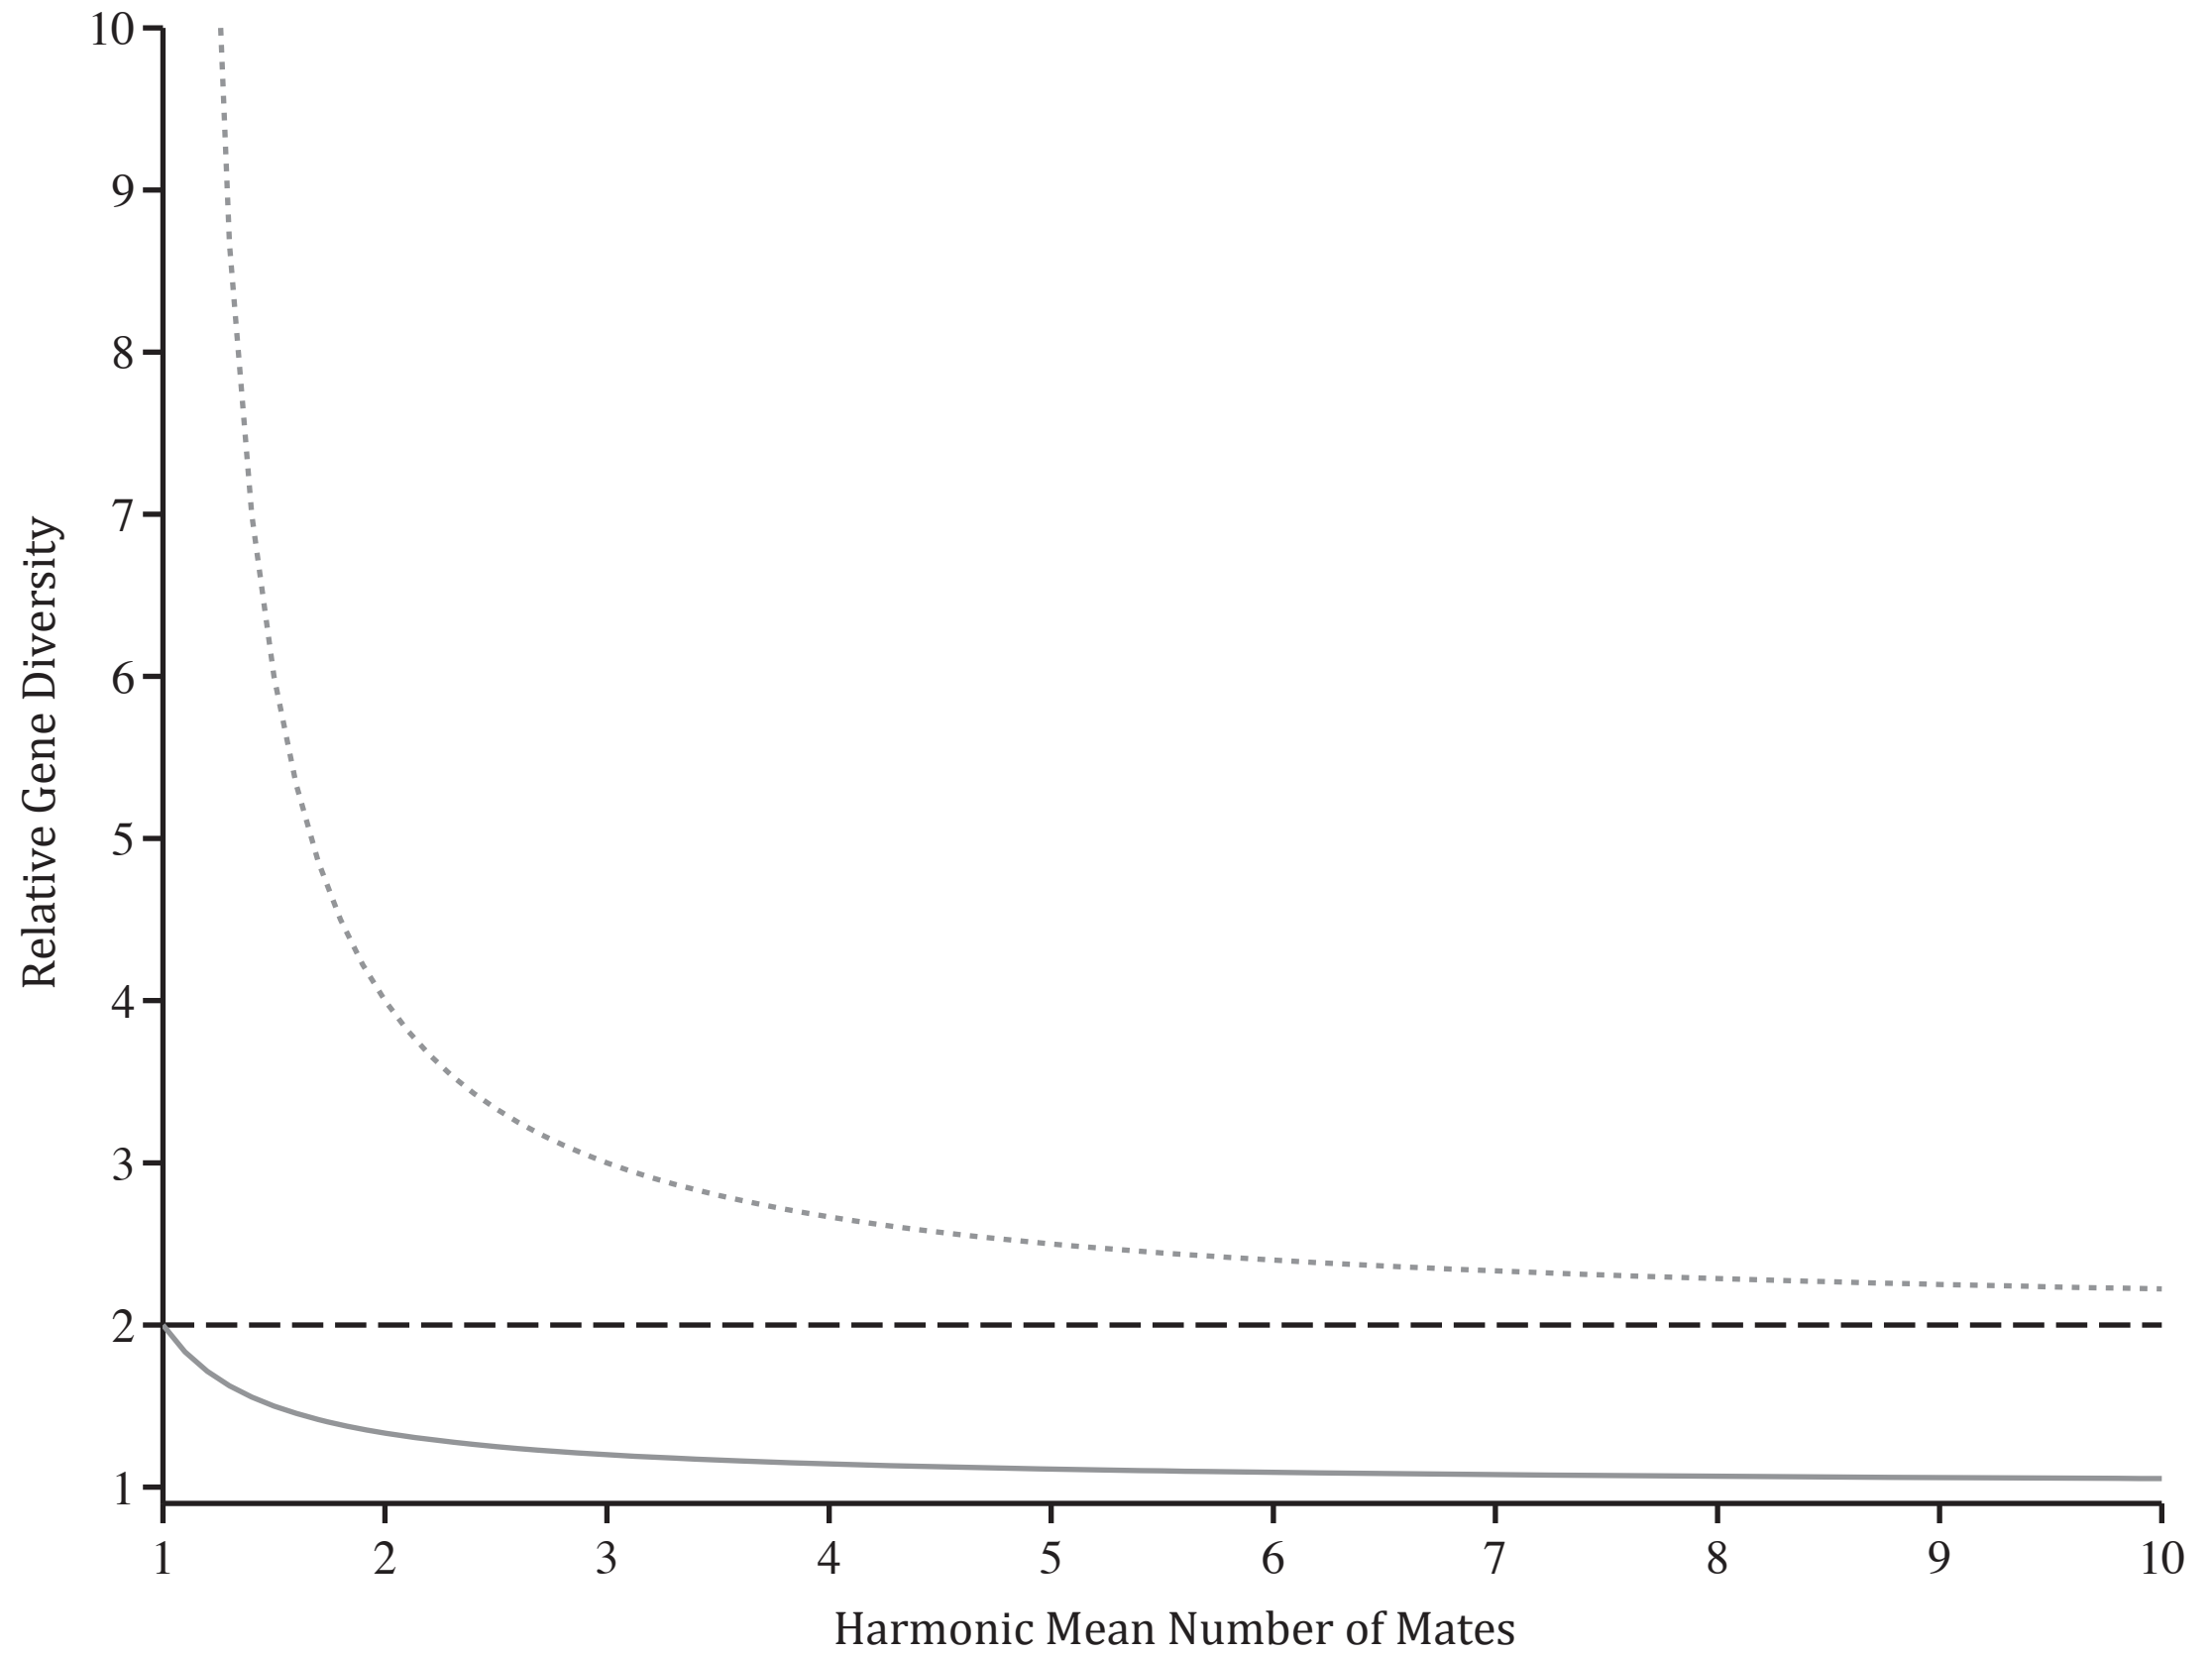

**Supplementary Figure 4.** Probability of fixation of a new mutation.

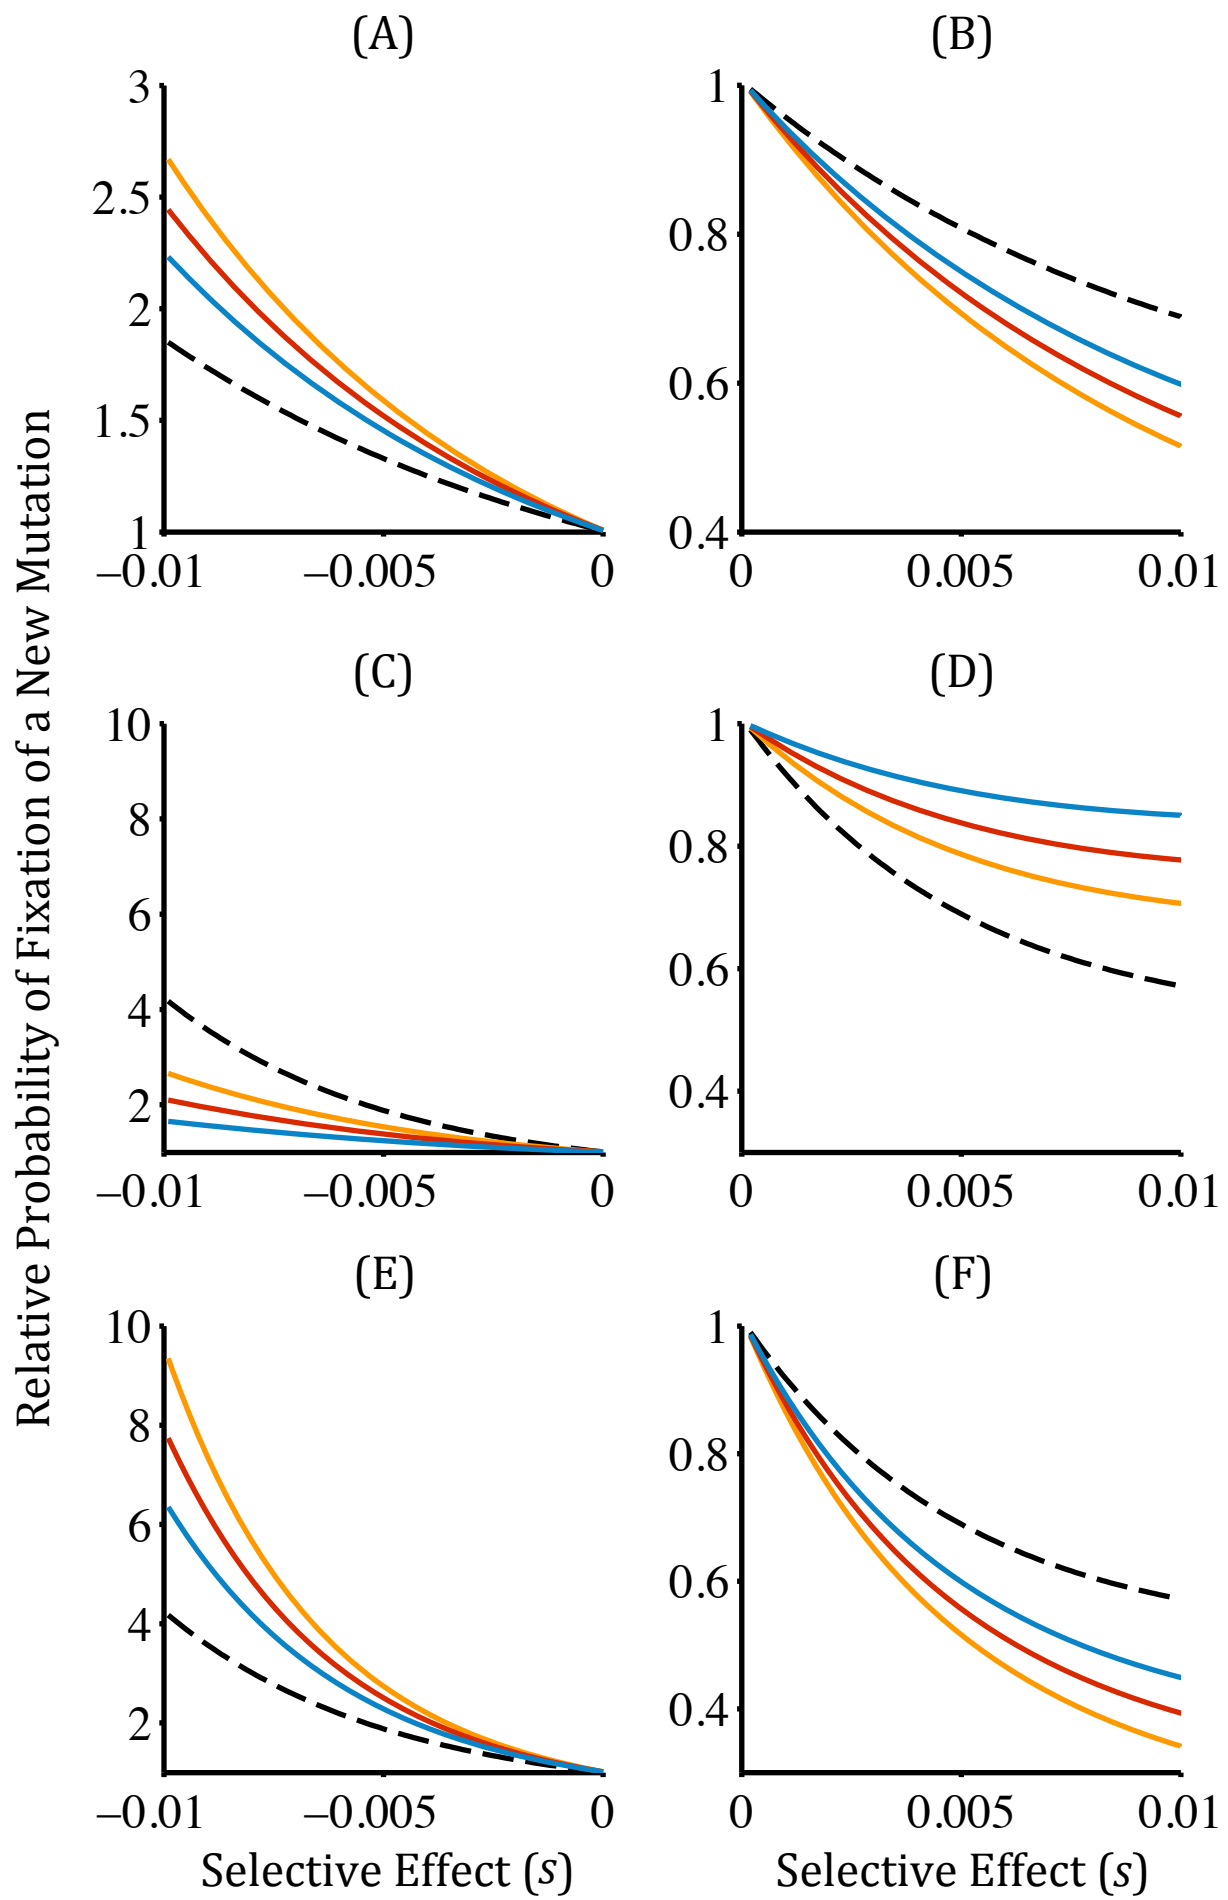



**Supplementary Figure 5.** Expected ratio of non-synonymous to synonymous substitutions.

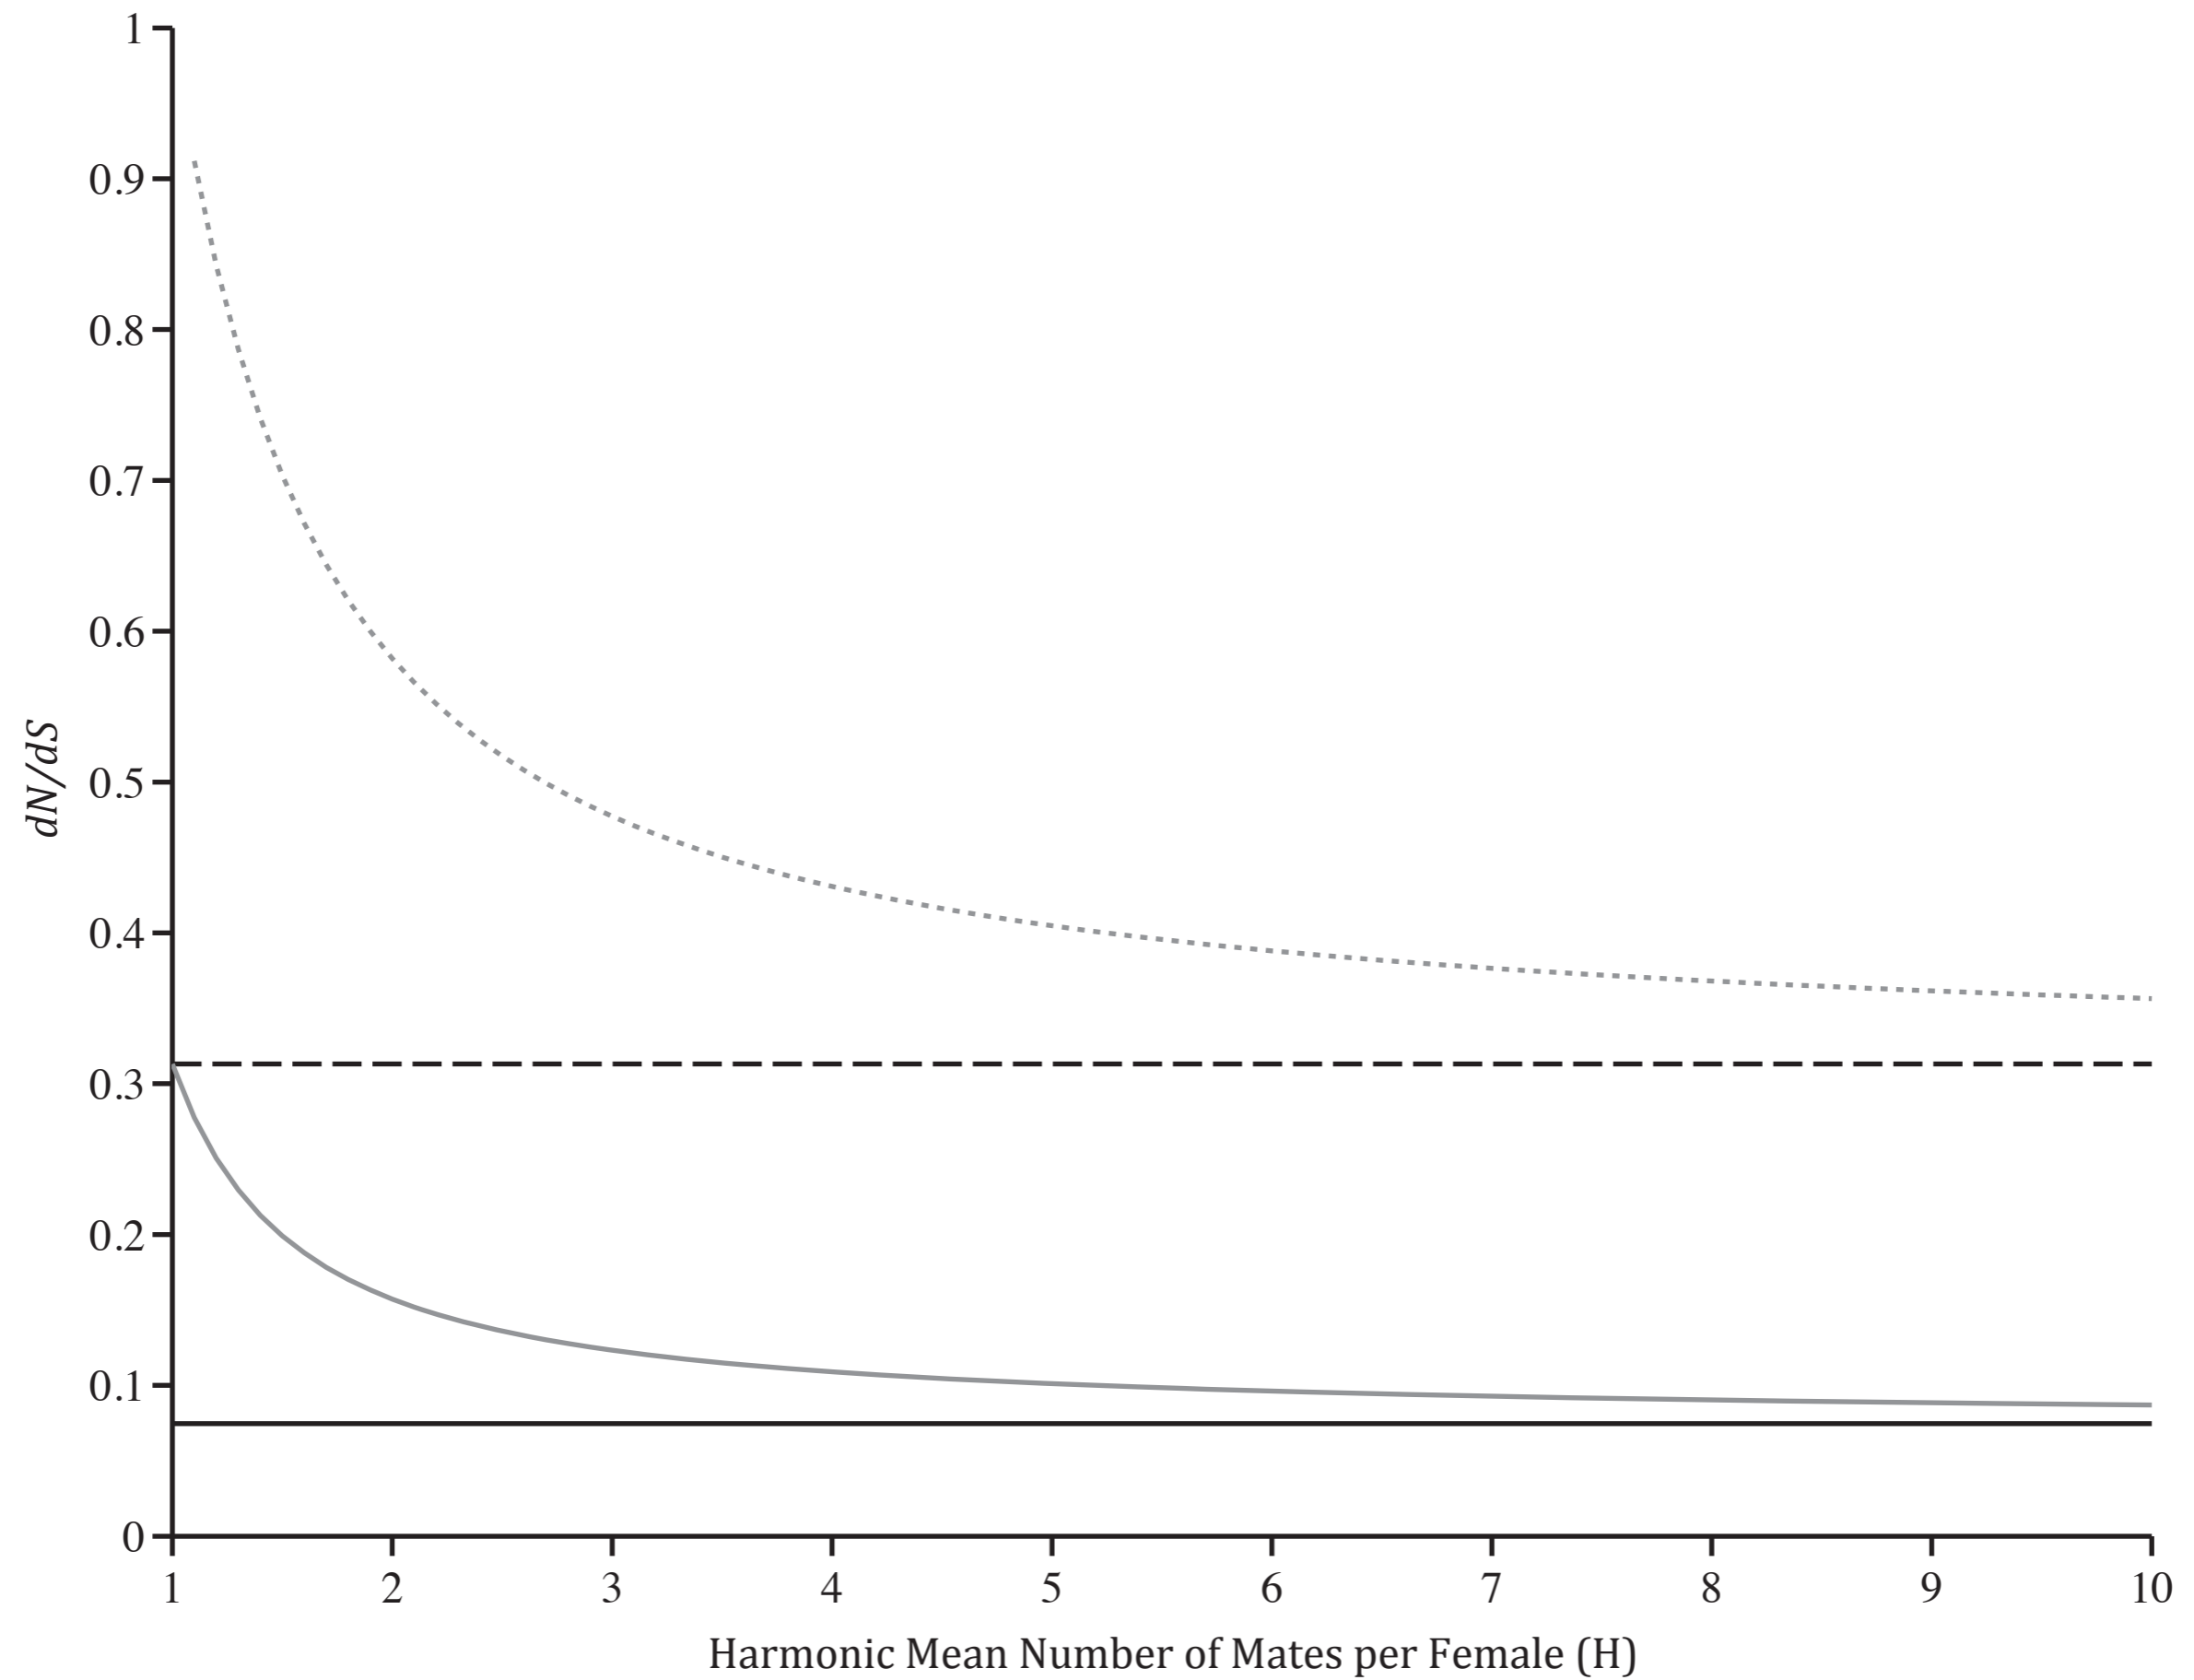

Supplement: NIHMS750363-supplement-Supp_Table_S1-S3___Fig_S1-S5.pdf [file NIHMS750363-supplement-Supp_Table_S1-S3___Fig_S1-S5.pdf]
